# Supplementary material for: Trends and cross-country inequalities in the global burden of acute hepatitis A : a systematic analysis study
Source: Research Square preprint supplement (doi:10.21203/rs.3.rs-6934284/v1), 2025-08-07
Supplement: Supplementary file 1 [file a91256017ef40b4784141ca1.docx]

**Supplementary Table 1:** The number and ASR of incidence of acute hepatitis A in 1990 and 2021 by 21 SDI regions, with AAPC from 1990 to 2021.

|  | **1990 Incidence** | |  | **2021 Incidence** | | **1990–2021** |
| --- | --- | --- | --- | --- | --- | --- |
| **Location** | **Number (95 % UIs)** | **ASR (95 % UIs),per 100 000** |  | **Number (95 % UIs)** | **ASR (95 % UIs), per 100 000** | **AAPC (95 % CI)** |
| East Asia | 31334354.31  (29190711.78 to 33721200.01) | 2589.34  (2398.45 to 2802.1) |  | 19819489.65  (18546445.38 to 21035590.81) | 1899.03  (1754.02 to 2041.3) | -1 (-1.03 to -0.97) |
| Southeast Asia | 14634026.96  (13329515.13 to 16219637.39) | 2830.66  (2485.48 to 3264.04) |  | 12976046.57  (12089781.75 to 13908025.86) | 2043.34  (1901.47 to 2191.4) | -1.06 (-1.12 to -1) |
| Central Europe | 1998812.33  (1864251.85 to 2129122.6) | 1873.17  (1736.69 to 2008.89) |  | 1274992.93  (1191420.01 to 1355837.85) | 1701.54  (1570.18 to 1830.09) | -0.31 (-0.33 to -0.28) |
| Central Asia | 2267046.66  (2145440.86 to 2401748.96) | 2621.55  (2475.97 to 2772.74) |  | 2329353.44  (2205220.05 to 2474042.58) | 2391.1  (2266.67 to 2536.93) | -0.3 (-0.32 to -0.28) |
| Oceania | 196045.87  (182552.72 to 210651.22) | 2280.75  (2116.59 to 2452.69) |  | 402073.04  (375055.12 to 430890.68) | 2306.81  (2158.15 to 2459.21) | 0.03 (0.01 to 0.06) |
| Eastern Europe | 3725651.48  (3478773.38 to 3964111.21) | 1959.94  (1817.31 to 2095.58) |  | 2690367.38  (2529214.8 to 2850079.99) | 1977.59  (1834.15 to 2110.46) | 0.03 (-0.04 to 0.09) |
| High-income North America | 2994576.2  (2745484.47 to 3238076.75) | 1176.7  (1071.69 to 1281.32) |  | 3591104.59  (3312871.36 to 3849303.15) | 1214.43  (1102.88 to 1316.01) | 0.09 (-0.02 to 0.19) |
| Australasia | 209554.58  (191587.98 to 226913.94) | 1126.27  (1022.73 to 1226.52) |  | 298866.97  (275635.38 to 322836.65) | 1188.02  (1083.46 to 1293.47) | **0.17 (0.15 to 0.19)** |
| Southern Latin America | 1228770.99  (1153781.46 to 1306440.08) | 2399.8  (2253.79 to 2550.74) |  | 1133417.19  (1058061.27 to 1206938.56) | 2055.73  (1902.24 to 2211.28) | -0.53 (-0.63 to -0.43) |
| Caribbean | 974247.08  (923109.08 to 1032208.39) | 2423.23  (2299.92 to 2562.99) |  | 995962.89  (943302.62 to 1052109.91) | 2384.95  (2244.67 to 2528.42) | -0.05 (-0.06 to -0.04) |
| Andean Latin America | 1210896.68  (1135700.19 to 1283679.66) | 2396.37  (2239.88 to 2542.54) |  | 1560849.05  (1478271.15 to 1642869.96) | 2435.18  (2302.46 to 2566.49) | 0.06 (0.04 to 0.07) |
| Central Latin America | 5421066.68  (5085647.68 to 5780386.61) | 2455.01  (2295.76 to 2613.77) |  | 5382007.73  (5108804.36 to 5651421.06) | 2410.86  (2282.21 to 2541.69) | -0.06 (-0.08 to -0.04) |
| North Africa and Middle East | 13654181.43  (12400686.64 to 15114916.03) | 3258.84  (2795.53 to 3819.56) |  | 15093177.77  (14269192.02 to 15953586.96) | 2384.35  (2251.65 to 2524.16) | -1.01 (-1.04 to -0.97) |
| Tropical Latin America | 3856022.32  (3640135.86 to 4061679.67) | 2168.6  (2039.69 to 2291.72) |  | 3819405.46  (3591547.57 to 4044433.36) | 1973.67  (1838.34 to 2106.29) | -0.31 (-0.36 to -0.27) |
| South Asia | 60242989.37  (48854083.17 to 73958284.74) | 4532.57  (3424.11 to 5970.58) |  | 43080164.65  (38881567.77 to 47068044.83) | 2499.21  (2276.41 to 2717.82) | -1.9 (-2.11 to -1.7) |
| Central Sub-Saharan Africa | 2572020.08  (2420265.72 to 2735798.62) | 2867.66  (2692.76 to 3044.37) |  | 4796955.47  (4542884.01 to 5071217.84) | 2462.47  (2332.43 to 2593.83) | -0.49 (-0.51 to -0.46) |
| High-income Asia Pacific | 1792885.25  (1656318.04 to 1919940.93) | 1211.7  (1107.34 to 1309.43) |  | 1508026.77  (1411144.92 to 1605680.65) | 1238.61  (1131.66 to 1349.37) | 0.07 (-0.02 to 0.15) |
| Eastern Sub-Saharan Africa | 9549682.16  (8625963.74 to 10453302.26) | 3327.02  (2765.27 to 3991.39) |  | 16194216.97  (15054772.26 to 17318155.23) | 2732.42  (2485.58 to 2971.59) | -0.63 (-0.66 to -0.6) |
| Southern Sub-Saharan Africa | 1810164.61  (1669595.87 to 1956356.1) | 2527.85  (2312.51 to 2754.17) |  | 2059714.56  (1899868.17 to 2226201.97) | 2518.31  (2328.71 to 2716.57) | -0.01 (-0.02 to 0.01) |
| Western Europe | 3670986.28  (3436966.97 to 3907532.7) | 1123.76  (1041.75 to 1209.62) |  | 3708990.76  (3459967.91 to 3955072.11) | 1090.76  (996.46 to 1182.86) | -0.09 (-0.11 to -0.08) |
| Western Sub-Saharan Africa | 10084544.55  (8879046.89 to 11600737.97) | 4348.69  (3353.24 to 5699.72) |  | 18144937.84  (17127003.92 to 19243333.58) | 2582.89  (2398.93 to 2779.21) | -1.66 (-1.72 to -1.6) |

ASR, age-standardized rate; AAPC, average annual percentage change

**Supplementary Table 2:** The number and ASR of DALYs of acute hepatitis A in 1990 and 2021 by 21 SDI regions, with AAPC from 1990 to 2021.

|  | **1990DALYs** | |  | **2021DALYs** | | **1990–2021** |
| --- | --- | --- | --- | --- | --- | --- |
| **Location** | **Number (95 % UIs)** | **ASR (95 % UIs),per 100 000** |  | **Number (95 % UIs)** | **ASR (95 % UIs), per 100 000** | **AAPC (95 % CI)** |
| East Asia | 727318.94  (519675.72 to 988701.41) | 63.65  (45.37 to 87.18) |  | 52531.11  (38233.28 to 70605.29) | 4.07  (2.88 to 5.63) | -8.72 (-9.31 to -8.13) |
| Southeast Asia | 380517.58  (250314.84 to 504269.97) | 89.49  (57.32 to 121.46) |  | 115196.63  (76711.61 to 175332.48) | 16.14  (10.84 to 24.32) | -5.59 (-5.74 to -5.44) |
| Central Europe | 5331.49  (3983.05 to 7032.54) | 4.72  (3.55 to 6.18) |  | 2990.98  (2038.71 to 4195.61) | 3.3  (2.23 to 4.66) | -0.86 (-1.04 to -0.69) |
| Central Asia | 66666.54  (54138.46 to 82212.3) | 76.67  (62.92 to 94.02) |  | 6151.39  (4737.87 to 7985.8) | 6.37  (4.91 to 8.3) | -8.34 (-8.54 to -8.14) |
| Oceania | 3634.27  (1740.78 to 7146.87) | 48.6  (22.39 to 105.05) |  | 2516.99  (1274.59 to 4229.58) | 16.66  (8.39 to 29.05) | -3.49 (-3.79 to -3.18) |
| Eastern Europe | 8876.92  (6470.32 to 12225.17) | 4.4  (3.23 to 6.04) |  | 5722.9  (3869.29 to 8264.04) | 3.53  (2.38 to 5.11) | -0.7 (-0.81 to -0.59) |
| High-income North America | 8847.83  (6460.35 to 11757.35) | 3.15  (2.28 to 4.21) |  | 11274.26  (8345.53 to 14991.66) | 3.11  (2.22 to 4.23) | -0.66 (-1.49 to 0.18) |
| Australasia | 505.63  (327.2 to 714.67) | 2.5  (1.62 to 3.56) |  | 708.79  (447.09 to 1028.82) | 2.45  (1.55 to 3.6) | -0.1 (-0.26 to 0.05) |
| Southern Latin America | 3595.72  (2717.54 to 5113.22) | 7.1  (5.37 to 10.12) |  | 2457.58  (1647.06 to 3439.39) | 3.86  (2.59 to 5.43) | -2.01 (-2.2 to -1.82) |
| Caribbean | 6723.3  (4224.19 to 10570.39) | 17.1  (10.93 to 26.5) |  | 3974.59  (2655.75 to 5496.02) | 9.27  (6.11 to 12.96) | -2.15 (-2.27 to -2.03) |
| Andean Latin America | 4533.22  (3613.49 to 5653.29) | 9.86  (7.96 to 12.22) |  | 3184.63  (2349.47 to 4197.03) | 4.81  (3.56 to 6.33) | -2.48 (-2.93 to -2.03) |
| Central Latin America | 24277.89  (20942.66 to 28372.49) | 11.75  (10.14 to 13.71) |  | 12710.58  (9717.15 to 16455.57) | 5.27  (4.05 to 6.82) | -2.63 (-3.25 to -2.01) |
| North Africa and Middle East | 434744.18  (291592.33 to 600985.59) | 124.7  (79.36 to 188.03) |  | 105255.78  (67892.34 to 151831.6) | 17.49  (11.15 to 25.34) | -6.13 (-6.34 to -5.92) |
| Tropical Latin America | 16160.32  (13844.85 to 19437.43) | 10.06  (8.7 to 12) |  | 8753.23  (6270.98 to 12110.86) | 4.08  (2.9 to 5.7) | -2.99 (-3.38 to -2.59) |
| South Asia | 4101387.44  (3333841.77 to 4996976.53) | 312.81  (254.2 to 379.36) |  | 1248490.14  (790103.36 to 2192976.51) | 72.39  (45.39 to 128.28) | **-3.27 (-3.58 to -2.96)** |
| Central Sub-Saharan Africa | 65092.36  (24430.83 to 135331.29) | 73.34  (28.76 to 151.43) |  | 15275.61  (7729.46 to 25688.52) | 9.21  (4.53 to 15.82) | -6.64 (-7.25 to -6.04) |
| High-income Asia Pacific | 6174.85  (4600.28 to 8178.34) | 4  (3.06 to 5.14) |  | 4019.68  (2690.83 to 5639.5) | 2.59  (1.71 to 3.66) | -1.66 (-1.95 to -1.36) |
| Eastern Sub-Saharan Africa | 232994.74  (139907.9 to 371807.94) | 110.08  (65.25 to 195.04) |  | 129857.84  (67138.94 to 287737.42) | 32.28  (15.65 to 77.03) | -4.04 (-4.27 to -3.8) |
| Southern Sub-Saharan Africa | 10989.14  (7192.54 to 17600.32) | 19.91  (12.62 to 33.02) |  | 8638.92  (5722.36 to 13458.43) | 10.94  (7.18 to 17.11) | -1.63 (-3.12 to -0.12) |
| Western Europe | 9776.45  (6615.23 to 13788.54) | 2.6  (1.75 to 3.68) |  | 10021.6  (6700.74 to 14053.22) | 2.43  (1.59 to 3.46) | -0.25 (-0.44 to -0.07) |
| Western Sub-Saharan Africa | 235154.63  (104666.94 to 437772.94) | 128.65  (63.52 to 224.53) |  | 67629.96  (46113.75 to 101887.28) | 14.93  (10.2 to 22.27) | -6.68 (-6.91 to -6.45) |

ASR, age-standardized rate; DALYs, disability-adjusted life-years; AAPC, average annual percentage change

**Supplementary Table 3**: The top 5 changes of AAPC for acute hepatitis A incidence and DALYs from 1990 to 2021 in 204 counties and territories.

|  | **1990–2021 Incidence** |  |  |  | **1990–2021 DALYs** |  |
| --- | --- | --- | --- | --- | --- | --- |
| **Location** | **AAPC (95 % CI)** | **P.Value** |  | **Location** | **AAPC (95 % CI)** | **P.Value** |
| Cambodia | -3.26 (-3.32 to -3.19) | ＜0.001 |  | Uzbekistan | -9.87 (-10.25 to -9.49) | ＜0.001 |
| Afghanistan | -2.59 (-2.76 to -2.42) | ＜0.001 |  | Angola | -9.47 (-9.88 to -9.06) | ＜0.001 |
| Nepal | -2.51 (-2.64 to -2.38) | ＜0.001 |  | China | -9.12 (-9.86 to -8.38) | ＜0.001 |
| Nigeria | -2.47 (-2.57 to -2.37) | ＜0.001 |  | Egypt | -8.57 (-10.63 to -6.45) | ＜0.001 |
| Bangladesh | -2.44 (-2.61 to -2.26) | ＜0.001 |  | Saudi Arabia | -8.5 (-11.23 to -5.69) | ＜0.001 |
| Thailand | 0.6 (0.39 to 0.81) | ＜0.001 |  | Italy | 0.11 (-0.8 to 1.03) | 0.813 |
| Japan | 0.49 (0.44 to 0.53) | ＜0.001 |  | Saint Vincent and the Grenadines | 0.09 (-0.17 to 0.35) | 0.505 |
| Italy | 0.43 (0.39 to 0.47) | ＜0.001 |  | New Zealand | 0.02 (-0.04 to 0.07) | 0.51 |
| New Zealand | 0.27 (0.24 to 0.29) | ＜0.001 |  | Canada | 0.01 (-0.28 to 0.29) | 0.96 |
| Ecuador | 0.18 (0.17 to 0.19) | ＜0.001 |  | - | - | - |

ASR, age-standardized rate; DALYs, disability-adjusted life-years; AAPC, average annual percentage change

**Supplementary Table 4**: Drivers of acute hepatitis A epidemiology by decomposition analysis

| **location** | **Overll difference** | **Aging**  **N(%)** | **Population N(%)** | **Epidemiological change N(%)** |  | **Overll difference** | **Aging**  **N(%)** | **Population**  **N(%)** | **Epidemiological change**  **N(%)** |
| --- | --- | --- | --- | --- | --- | --- | --- | --- | --- |
| **Incidence** | | | | |  | **DALYs** | | | |
| Global | -12568487.61 | -33505696.01 (266.58%) | 67454556.6 (-536.7%) | -46517348.2 (370.11%) |  | -4535978.64 | -607368.25 (13.39%) | 1764701.7 (-38.9%) | -5693312.09 (125.51%) |
| High SDI | 286822.33 | -1673474.92 (-583.45%) | 2231864.99 (778.14%) | -271567.74 (-94.68%) |  | -13203.42 | -1932.16 (14.63%) | 8027.3 (-60.8%) | -19298.56 (146.16%) |
| High-middle SDI | -4297693.96 | -5963118.2 (138.75%) | 4098854.91 (-95.37%) | -2433430.67 (56.62%) |  | -203986.54 | -17977.15 (8.81%) | 32637.94 (-16%) | -218647.33 (107.19%) |
| Middle SDI | -9660403.59 | -14517489.43 (150.28%) | 17524234.31 (-181.4%) | -12667148.48 (131.12%) |  | -1257733.85 | -133044.34 (10.58%) | 342691.85 (-27.25%) | -1467381.35 (116.67%) |
| Low-middle SDI | -10254080.32 | -12393206.64 (120.86%) | 28988190.27 (-282.7%) | -26849063.95 (261.84%) |  | -2279108.08 | -354759.11 (15.57%) | 1211651.26 (-53.16%) | -3136000.23 (137.6%) |
| Low SDI | 11353083.93 | -4262517.2 (-37.55%) | 28652870.7 (252.38%) | -13037269.57 (-114.83%) |  | -781103.87 | -96549.03 (12.36%) | 924130.88 (-118.31%) | -1608685.72 (205.95%) |

DALYs, disability-adjusted life-years; SDI, sociodemographic index
